# Supplementary material
Source: Research Square preprint supplement (doi:10.21203/rs.3.rs-8961896/v1)
Supplement: Supplementary file 1 [file 32a49ca336281e58d8f207e6.docx]

| **Table S1-A. Multivariate Linear Regression Analysis of Factors Associated with RASI** | | | | | | |
| --- | --- | --- | --- | --- | --- | --- |
| **Variable** | **Model 1** | | | **Model 2** | | |
|  | **β (95% CI)** | **P value** |  | **β (95% CI)** | **P value** |  |
| Sex (female vs male) | -0.237 (-0.463, -0.011) | 0.040 | * | -0.128 (-0.365, 0.109) | 0.289 |  |
| Age (per year) | 0.206 (0.093, 0.319) | <0.001 | *** | 0.321 (0.196, 0.446) | <0.001 | *** |
| Baseline AL | -0.260 (-0.385, -0.135) | <0.001 | *** | -0.196 (-0.344, -0.047) | 0.010 | ** |
| Baseline ACD | -0.196 (-0.315, -0.077) | 0.001 | ** | -0.086 (-0.230, 0.058) | 0.244 |  |
| Baseline CCT | -0.009 (-0.123, 0.105) | 0.878 |  | -0.009 (-0.124, 0.107) | 0.882 |  |
| Baseline Km | 0.058 (-0.058, 0.174) | 0.326 |  | 0.018 (-0.106, 0.142) | 0.773 |  |
| Baseline LT | 0.146 (0.030, 0.262) | 0.013 | * | 0.062 (-0.067, 0.191) | 0.347 |  |
| Baseline WTW | -0.084 (-0.200, 0.031) | 0.150 |  | -0.021 (-0.155, 0.114) | 0.763 |  |
| Baseline pupil diameter | 0.002 (-0.112, 0.115) | 0.977 |  | 0.063 (-0.055, 0.182) | 0.296 |  |
| ΔACD/ΔAL | 2.557 (2.452, 2.661) | <0.001 | *** | 2.575 (2.469, 2.681) | <0.001 | *** |
| AL growth rate |  |  |  |  |  |  |
| Low (reference) | — |  |  | — |  |  |
| Moderate | -0.507 (-0.811, -0.203) | 0.001 | ** | -0.423 (-0.730, -0.116) | 0.007 | ** |
| High | -0.444 (-0.742, -0.145) | 0.004 | ** | -0.313 (-0.620, -0.005) | 0.046 | * |

*Abbreviations: RASI, refractive axial sensitivity index (D/mm); CI, confidence interval; AL, axial length (mm); ACD, anterior chamber depth (mm); CCT, central corneal thickness (µm); Km, mean keratometry (D); LT, lens thickness (mm); WTW, white-to-white distance (mm).*

*Model 1: adjusted for sex, age, baseline ocular biometric parameters, ΔACD/ΔAL, and AL growth rate.*

*Model 2: Model 1 with additional adjustment for interaction terms.*

** P < 0.05; ** P < 0.01; *** P < 0.001. All continuous variables were standardized (Z-score) before analysis.*

| **Table S1-B. Multivariate Linear Regression Analysis of Factors Associated with ΔACD/ΔAL** | | | | | | |
| --- | --- | --- | --- | --- | --- | --- |
| **Variable** | **Model 1** | | | **Model 2** | | |
|  | **β (95% CI)** | **P value** |  | **β (95% CI)** | **P value** |  |
| Sex (female vs male) | 0.012 (-0.020, 0.043) | 0.460 |  | 0.061 (0.029, 0.094) | <0.001 | *** |
| Age (per year) | 0.001 (-0.014, 0.017) | 0.879 |  | 0.063 (0.046, 0.080) | <0.001 | *** |
| Baseline AL | -0.133 (-0.150, -0.116) | <0.001 | *** | -0.101 (-0.121, -0.080) | <0.001 | *** |
| Baseline ACD | -0.109 (-0.125, -0.092) | <0.001 | *** | -0.045 (-0.065, -0.025) | <0.001 | *** |
| Baseline CCT | -0.006 (-0.022, 0.009) | 0.428 |  | -0.009 (-0.025, 0.007) | 0.251 |  |
| Baseline Km | 0.011 (-0.005, 0.027) | 0.176 |  | -0.009 (-0.026, 0.008) | 0.285 |  |
| Baseline LT | 0.090 (0.074, 0.106) | <0.001 | *** | 0.046 (0.028, 0.063) | <0.001 | *** |
| Baseline WTW | 0.011 (-0.004, 0.027) | 0.158 |  | 0.057 (0.038, 0.075) | <0.001 | *** |
| Baseline pupil diameter | -0.048 (-0.064, -0.033) | <0.001 | *** | -0.021 (-0.037, -0.004) | 0.013 | * |
| RASI | 0.354 (0.339, 0.368) | <0.001 | *** | 0.349 (0.335, 0.363) | <0.001 | *** |
| AL growth rate |  |  |  |  |  |  |
| Low (reference) | — |  |  | — |  |  |
| Moderate | -0.345 (-0.386, -0.304) | <0.001 | *** | -0.307 (-0.348, -0.265) | <0.001 | *** |
| High | -0.446 (-0.487, -0.405) | <0.001 | *** | -0.386 (-0.428, -0.345) | <0.001 | *** |

*Abbreviations: ACD, anterior chamber depth (mm); AL, axial length (mm); RASI, refractive axial sensitivity index (D/mm); CI, confidence interval; CCT, central corneal thickness (µm); Km, mean keratometry (D); LT, lens thickness (mm); WTW, white-to-white distance (mm).*

*Model 1: adjusted for sex, age, baseline ocular biometric parameters, RASI, and AL growth rate.*

*Model 2: Model 1 with additional adjustment for interaction terms.*

** P < 0.05; ** P < 0.01; *** P < 0.001. All continuous variables were standardized (Z-score) before analysis.*

**Table S2. Variance Inflation Factor (VIF) for Multivariate Regression Models**

| **Variable** | **Model 2 (RASI)** | **Model 2 (ΔACD/ΔAL)** |
| --- | --- | --- |
| Sex | 1.103 | 1.102 |
| Age group | 1.233 | 1.233 |
| Baseline AL | 1.733 | 1.724 |
| Baseline ACD | 2.041 | 2.038 |
| Baseline CCT | 1.072 | 1.072 |
| Baseline Km | 1.378 | 1.378 |
| Baseline LT | 1.385 | 1.385 |
| Baseline WTW | 1.418 | 1.414 |
| Baseline pupil diameter | 1.108 | 1.108 |
| AL growth rate | 1.090 | 1.066 |
| ΔACD/ΔAL | 1.048 | — |
| RASI | — | 1.003 |

*Abbreviations: VIF, variance inflation factor; RASI, refractive axial sensitivity index (D/mm); AL, axial length (mm); ACD, anterior chamber depth (mm); CCT, central corneal thickness (µm); Km, mean keratometry (D); LT, lens thickness (mm); WTW, white-to-white distance (mm).*

*Note: All VIF values < 2.1, indicating no multicollinearity.*

# **Supplementary Table 3. Sensitivity Analyses**

To verify the robustness of the primary findings, we conducted four sensitivity analyses as follows.

## **1. Exclusion of Samples with Minimal Axial Length Changes**

Given that the calculations of both RASI and ΔACD/ΔAL use ΔAL as the denominator, extremely small ΔAL values may result in unstable ratios. To assess this potential influence, we repeated the multivariable regression analysis after excluding samples with |ΔAL| < 0.05 mm (n = 333, 2.4%) and |ΔAL| < 0.10 mm (n = 930, 6.7%), respectively (Table S3-A).

The results demonstrated that the positive association between ΔACD/ΔAL and RASI remained stable after excluding samples with minimal ΔAL. After excluding |ΔAL| < 0.05 mm, the regression coefficient for ΔACD/ΔAL was 0.448 (95% CI: 0.415–0.481, P < 0.001); after excluding |ΔAL| < 0.10 mm, it was 0.175 (95% CI: 0.147–0.203, P < 0.001). Although the effect sizes decreased compared to the primary analysis (β = 1.637), with reductions of 72.6% and 89.3% respectively, the direction of association remained consistent and statistically significant. The attenuation in effect size can be attributed to the high variability of ratios in samples with minimal ΔAL, suggesting that the primary analysis results may be partially influenced by mathematical coupling effects; however, the positive association between ΔACD/ΔAL and RASI is robust.

## **2. Validation of Inflection Points in Axial Elongation Rate**

***Bootstrap Validation***

The inflection points identified in the restricted cubic spline (RCS) analysis were validated through 1,000 bootstrap resamples (Table S3-B). The results showed that for the relationship between axial elongation rate and RASI, the bootstrap median for the first inflection point was 0.232 mm/year (95% CI: 0.100–0.331), encompassing the value of 0.27 mm/year identified in the primary analysis; the bootstrap median for the second inflection point was 0.736 mm/year (95% CI: 0.655–0.832), encompassing the value of 0.68 mm/year identified in the primary analysis. The 95% confidence intervals for both inflection points were relatively narrow, and all 1,000 resamples successfully identified the inflection points, indicating good stability and reproducibility of the inflection point estimates.

***Piecewise Linear Regression***

Piecewise linear regression was performed using the inflection points identified in the primary analysis (0.27 mm/year and 0.68 mm/year) as predetermined breakpoints (Table S3-C). For the relationship between axial elongation rate and RASI, Segment 1 (< 0.27 mm/year, n = 4,866) had a slope of 2.299, Segment 2 (0.27–0.68 mm/year, n = 7,557) had a slope of −1.340, and the slope change from Segment 1 to Segment 2 was −3.640 (P = 0.003), confirming the ascending-then-descending pattern observed in the RCS analysis. The slope change from Segment 2 to Segment 3 (> 0.68 mm/year, n = 1,437) was +1.929, which did not reach statistical significance (P = 0.108), but the trend of slope transition from negative to positive was consistent with the RCS curve.

For the relationship between axial elongation rate and ΔACD/ΔAL, the piecewise regression results showed: Segment 1 slope of −1.370, Segment 2 slope of −0.512, and Segment 3 slope of 0.125. The slope changes from Segment 1 to Segment 2 (+0.857, P < 0.001) and from Segment 2 to Segment 3 (+0.637, P < 0.001) were both statistically significant, confirming the nonlinear pattern of ΔACD/ΔAL showing an initial steep decline followed by stabilization and slight recovery with increasing axial elongation rate.

## **3. Complete Case Analysis**

In the original dataset, variables including CCT, corneal curvature, lens thickness, and pupil diameter had approximately 24–25% missing values, which were handled by mean imputation in the primary analysis. To evaluate the impact of the imputation method on the results, we performed a complete case analysis using only samples with complete data (n = 10,376, representing 74.9% of the total sample) (Table S3-E).

The differences between complete cases and the full sample in baseline characteristics were minimal: age difference of −0.11 years, baseline axial length difference of +0.003 mm, and baseline anterior chamber depth difference of +0.011 mm, indicating that the complete cases were representative of the full sample.

For the multivariable regression Model 2 of RASI, the regression coefficient for the core predictor ΔACD/ΔAL in the complete case analysis was 1.637 (95% CI: 1.578–1.696, P < 0.001), representing a 36.7% decrease compared to the imputed data (β = 2.586), but the direction of effect and statistical significance remained consistent. The regression coefficient for age slightly increased in complete cases (+32.6%), with consistent significance. Baseline AL reached statistical significance in the complete case analysis (β = 0.081, P = 0.045), whereas it was not significant in the imputed data (P = 0.284); however, the direction of effect was consistent between the two analyses.

In summary, the sensitivity analyses demonstrate the robustness of the primary conclusions: (1) the positive association between ΔACD/ΔAL and RASI remained significant after excluding samples with minimal ΔAL; (2) the nonlinear inflection points of axial elongation rate remained stable after validation by bootstrap and piecewise regression, with 95% confidence intervals encompassing the primary analysis estimates; (3) the lens compensation pattern was observed across different baseline LT strata, with the “plateau” phenomenon supporting the compensation “exhaustion” hypothesis; and (4) in the complete case analysis, the direction and significance of core regression results remained consistent with the imputed data, indicating that the missing data handling method did not substantially affect the primary conclusions.

**Table S3-A.** Impact of Excluding Samples with Minimal Axial Length Changes on the ΔACD/ΔAL–RASI Relationship

| **Analysis** | **Sample Size** | **ΔACD/ΔAL β** | **95% CI** | **P-value** | **Change** |
| --- | --- | --- | --- | --- | --- |
| Primary analysis | 10,376 | 1.637 | [1.578, 1.696] | <0.001 | — |
| Excluding |ΔAL|<0.05 mm | 10,111 | 0.448 | [0.415, 0.481] | <0.001 | −72.6% |
| Excluding |ΔAL|<0.10 mm | 9,621 | 0.175 | [0.147, 0.203] | <0.001 | −89.3% |

**Table S3-B.** 95% Confidence Intervals for Axial Elongation Rate Inflection Points Validated by Bootstrap Method

| **Inflection Point** | **Primary Analysis** | **Bootstrap Median** | **95% CI** | **Valid Resamples** |
| --- | --- | --- | --- | --- |
| First inflection point | 0.27 mm/year | 0.232 mm/year | [0.100, 0.331] | 1000/1000 |
| Second inflection point | 0.68 mm/year | 0.736 mm/year | [0.655, 0.832] | 1000/1000 |

**Table S3-C.** Piecewise Regression of Axial Elongation Rate and RASI

| **Segment** | **Sample Size** | **Slope** | **Slope Change** | **P-value** |
| --- | --- | --- | --- | --- |
| Segment 1: <0.27 mm/year | 4,866 | 2.299 | — | — |
| Segment 2: 0.27–0.68 mm/year | 7,557 | −1.340 | −3.640 | 0.003 |
| Segment 3: >0.68 mm/year | 1,437 | 0.589 | +1.929 | 0.108 |

**Table S3-D.** Piecewise Regression of Axial Elongation Rate and ΔACD/ΔAL

| **Segment** | **Sample Size** | **Slope** | **Slope Change** | **P-value** |
| --- | --- | --- | --- | --- |
| Segment 1: <0.27 mm/year | 4,866 | −1.370 | — | — |
| Segment 2: 0.27–0.68 mm/year | 7,557 | −0.512 | +0.857 | <0.001 |
| Segment 3: >0.68 mm/year | 1,437 | 0.125 | +0.637 | <0.001 |

*Between-group difference test: F = 43.28, P < 0.001*

**Table S3-E.** Complete Case Analysis Results

*(A) RASI Multivariable Regression Model*

| **Variable** | **Imputed β** | **Complete Case β** | **Change** | **Significance Consistent** |
| --- | --- | --- | --- | --- |
| ΔACD/ΔAL | 2.586*** | 1.637*** | −36.7% | Yes |
| Age | 0.148* | 0.196*** | +32.6% | Yes |
| Baseline AL | 0.076 | 0.081* | +7.2% | No† |
| Baseline LT | −0.015 | 0.058 | — | Yes (both ns) |
| Baseline ACD | 0.099 | 0.069 | −29.7% | Yes (both ns) |

**P < 0.05, **P < 0.01, ***P < 0.001, ns = not significant*

*†Baseline AL reached statistical significance in the complete case analysis (P = 0.045), but was not significant in the imputed data (P = 0.284)*
