# Supplementary material
Source: Research Square preprint supplement (doi:10.21203/rs.3.rs-8961896/v1)
Supplement: Supplementary file 2 [file b462f97b5d7318b8e0d8e3d3.docx]

**Supplementary Figure 1. Restricted Cubic Spline Analysis of ΔLEN**

**A**


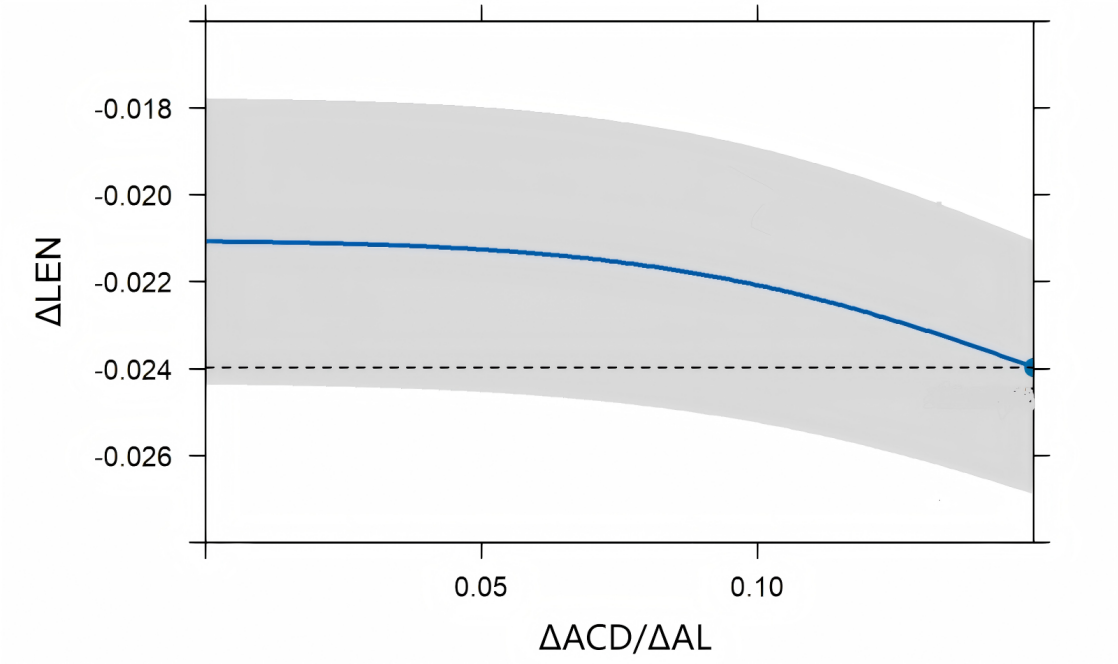


**B**


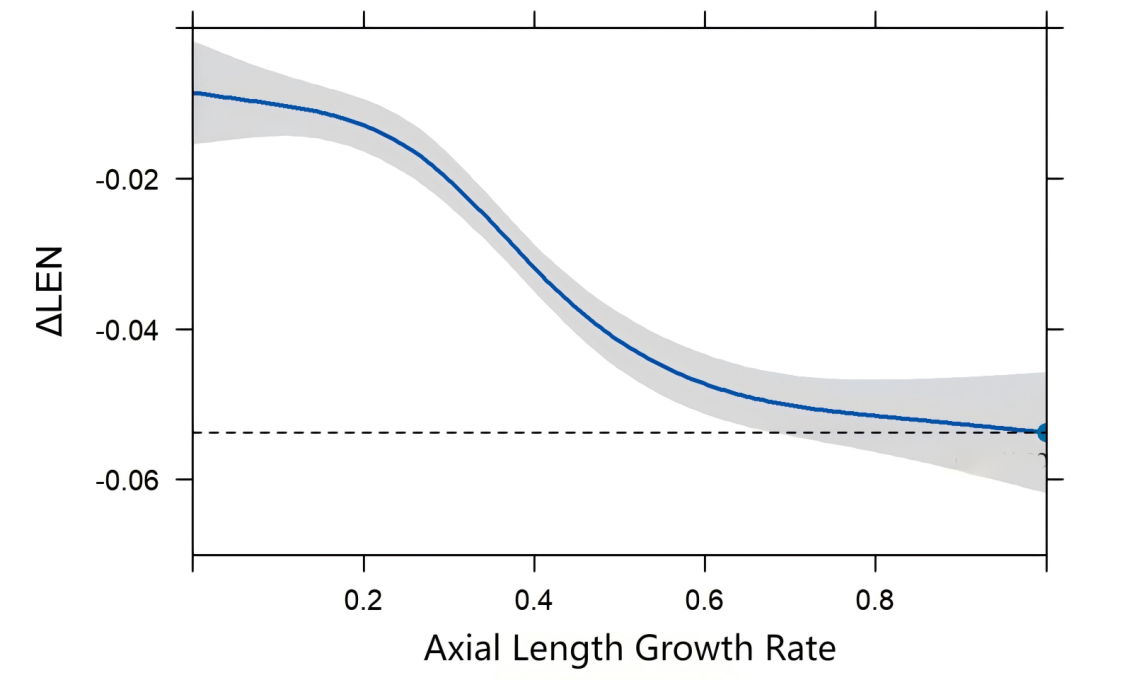


**Supplementary Figure 1.** Restricted cubic spline (RCS) analysis of non-linear relationships between ΔLEN (mm) and related variables within the Model 2 framework. (A) Relationship between ΔACD/ΔAL and ΔLEN (mm). (B) Relationship between axial growth rate (mm/year) and ΔLEN (mm). All variance inflation factors (VIF) were below 5, indicating no significant multicollinearity in the model. The overall associations were assessed using F-tests, and both ΔACD/ΔAL and axial growth rate demonstrated significant overall associations with ΔLEN (P < 0.001 for both).
